# Supplementary material for: Application of decarboxylation reactions for improvement of dielectric properties of a methacrylic polymer
Source: Royal Society of Chemistry journal article supplement (doi:10.1039/d1ra01626a), 2021-01-01
Supplement: d1ra01626a1.pdf [file d1ra01626a1.pdf]

## Supporting Information

### Application of decarboxylation reactions on improvement of dielectric properties of methacrylic polymer

Bao Li\*, Hiroshi Matsutani\*, Mika Kimura,<sup>a</sup> Masato Miyatake, Yasuharu Murakami, Sadaaki Katoh, Akitoshi Tanimoto, Xiaodong Ma, and Xuesong Jiang

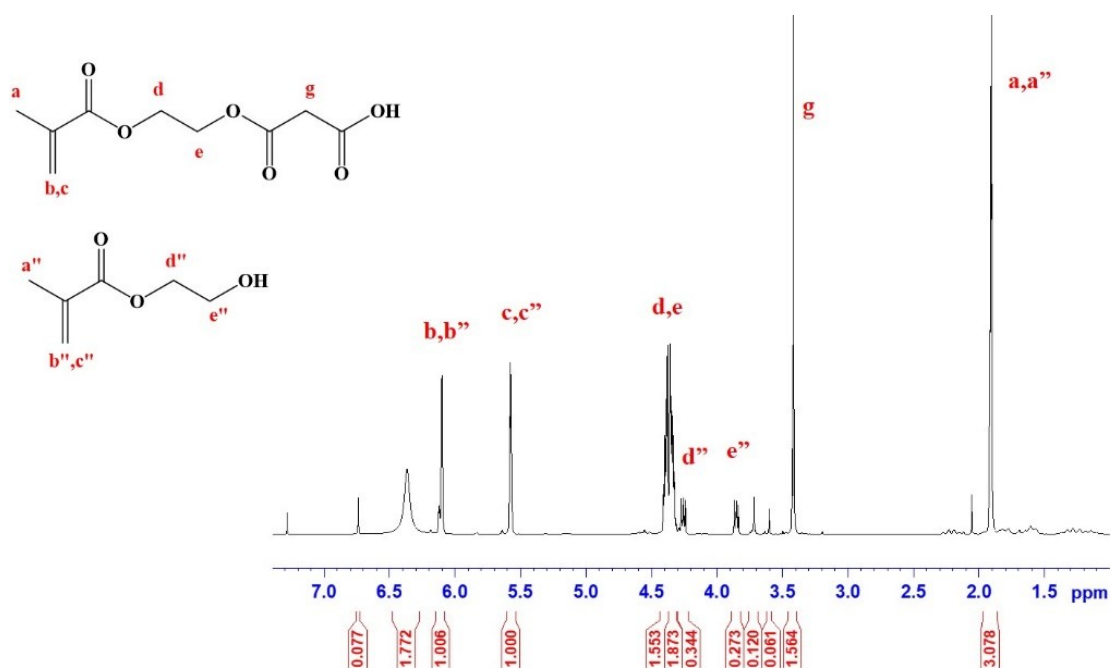

Figure S1 <sup>1</sup>H NMR spectrum of the obtained monomer product

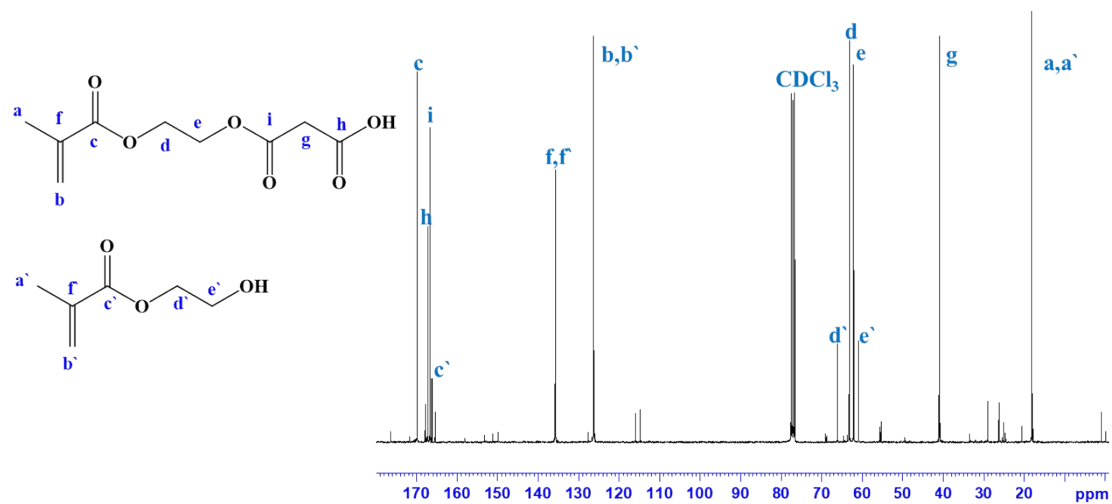

Figure S2  $^{13}\text{C}$  NMR spectrum of the obtained monomer product

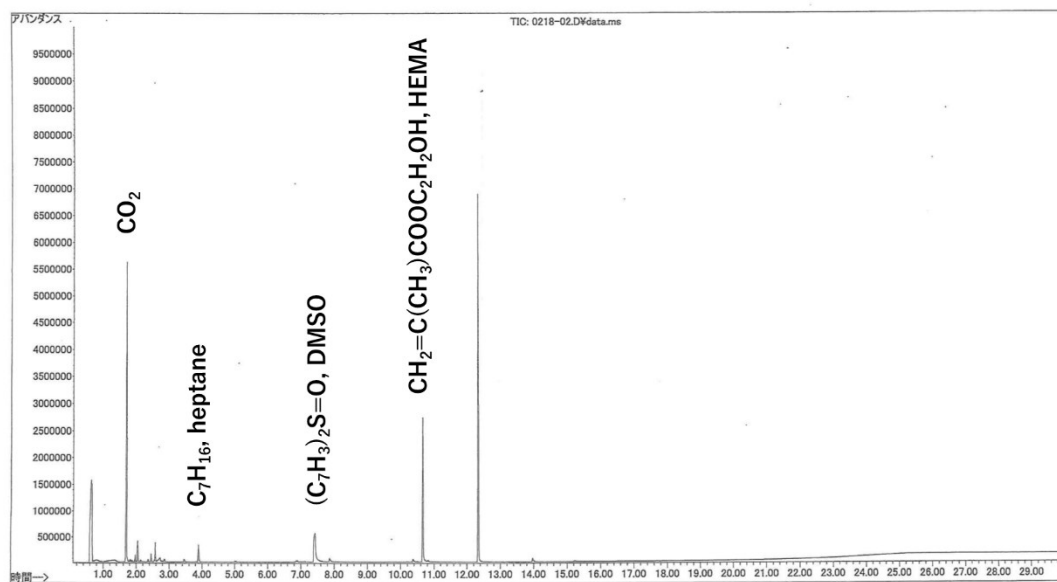

図1 PHEMA Malonate のガスクロマトグラム

Figure S3 The GC analysis of pyrolysis products of PHEMAMal powder

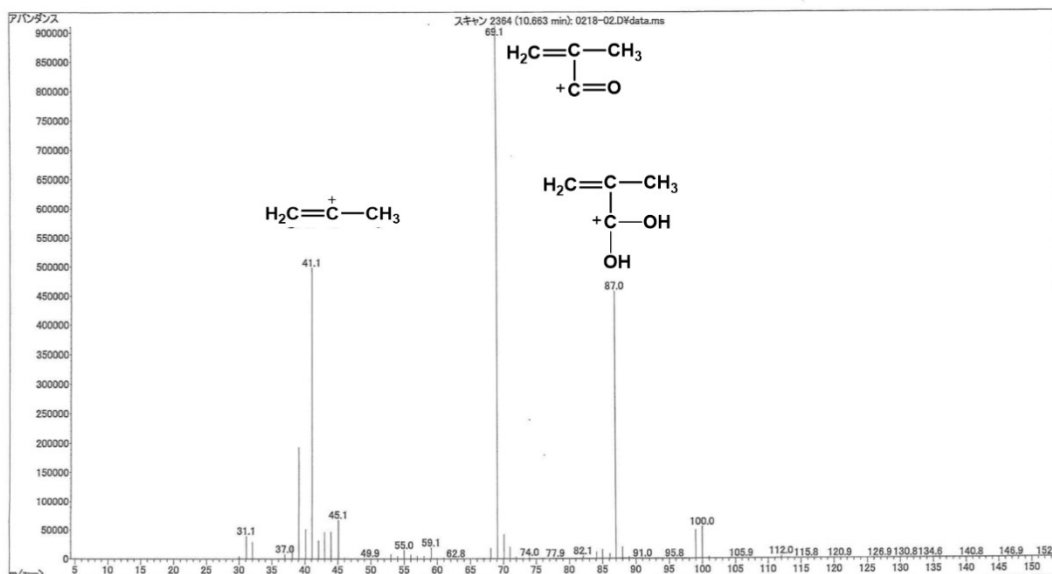

図3 保持時間 10.7 分の成分のマススペクトル

Figure S4 The MS spectrum of the component from GC at retention time of 10.7 min

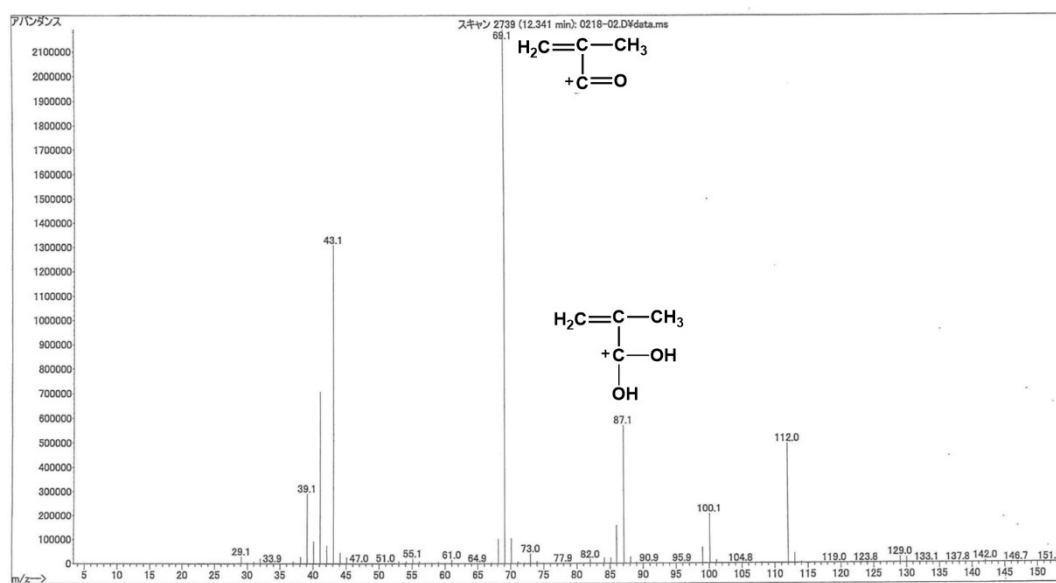

図4 保持時間 12.3 分の成分のマススペクトル

Figure S5 The MS spectrum of the component from GC at retention time of 12.3 min

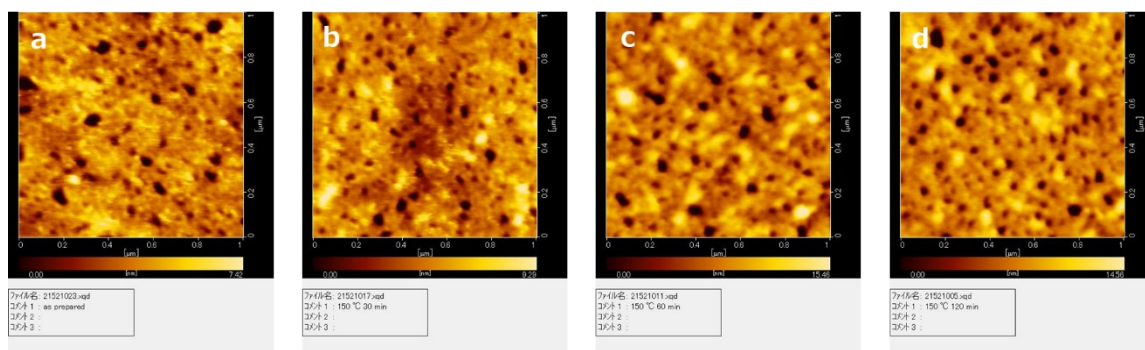

**Figure S6** The SPM/AFM images of the prepared films [r.t., **surface topography**, 1 μm × 1 μm]: (a) before thermal treatment, and after thermal treatment at 150 °C for (b) 30 min. (c) 60 min., and (d) 120 min. respectively.

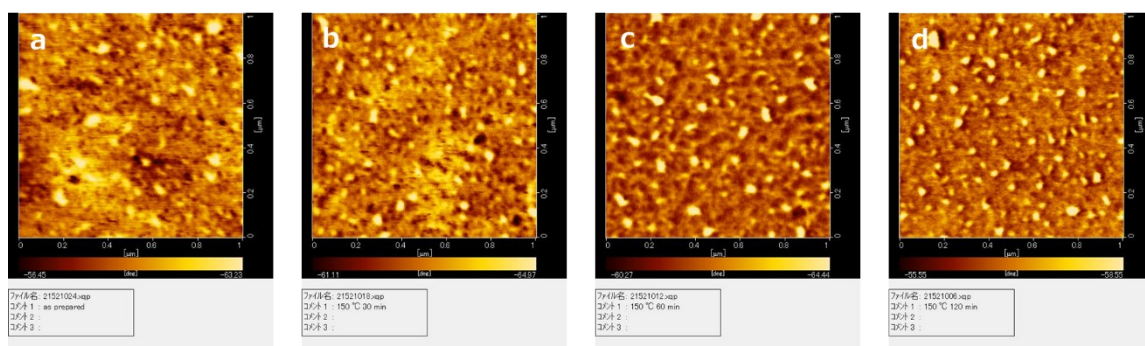

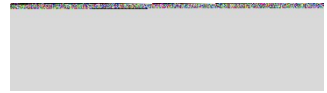

**Figure S7** The SPM/AFM images of the prepared films [r.t., **phase mode**,  $1\ \mu\text{m} \times 1\ \mu\text{m}$ ]: (a) before thermal treatment, and after thermal treatment at  $150\ ^\circ\text{C}$  for (b) 30 min. (c) 60 min., and (d) 120 min. respectively.

#### Acknowledgement

The authors would like to thank Mr. Noriyuki Nakayama for the support on AFM measurements.
